# Supplementary material for: Magnetic response properties of carbon nano-onions
Source: Royal Society of Chemistry journal article supplement (doi:10.1039/d2cp02718f), 2022-01-01
Supplement: d2cp02718f1.pdf [file d2cp02718f1.pdf]

Cite this: DOI: 00.0000/xxxxxxxxxx

## Electronic Supporting Information (ESI)

### **Magnetic response properties of carbon nano-onions**

Mesías Orozco-Ic,<sup>a</sup> and Dage Sundholm<sup>\*a</sup>

Received Date

Accepted Date

DOI: 00.0000/xxxxxxxxxx

---

<sup>a</sup> Department of Chemistry, Faculty of Science, P.O. Box 55, A. I. Virtasen aukio 1, FI-00014 University of Helsinki, Finland. E-mail: [sundholm@chem.helsinki.fi](mailto:sundholm@chem.helsinki.fi)

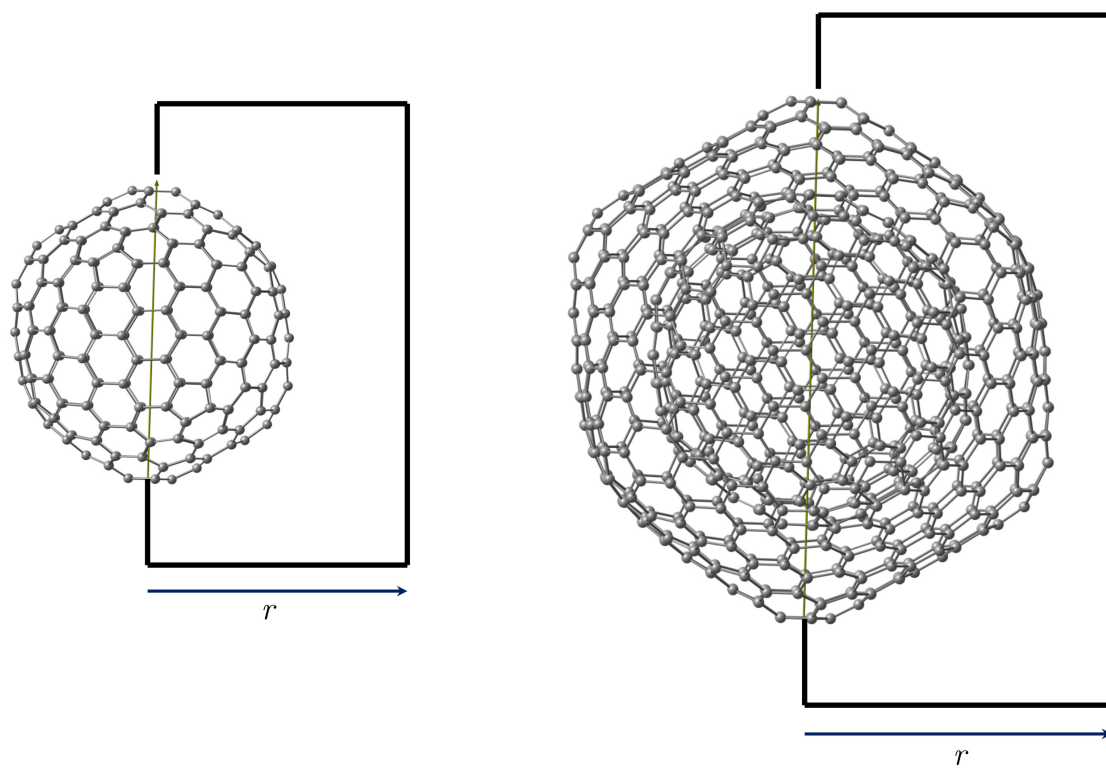

**Fig. S1** Schematic of the integration planes used in this work for single-layer fullerenes (left) and  $C_n$ -CNOs (right). The height of these planes measured from the bottom to the top is 30 Å, while the radial width extends to 15 Å. The structures were oriented with the  $z$  axis (shown with a yellow arrow) perpendicular to a 5- or 6-MR as appropriate. The  $r$  coordinate of the ring-current strength profiles runs on the horizontal axis of these planes.

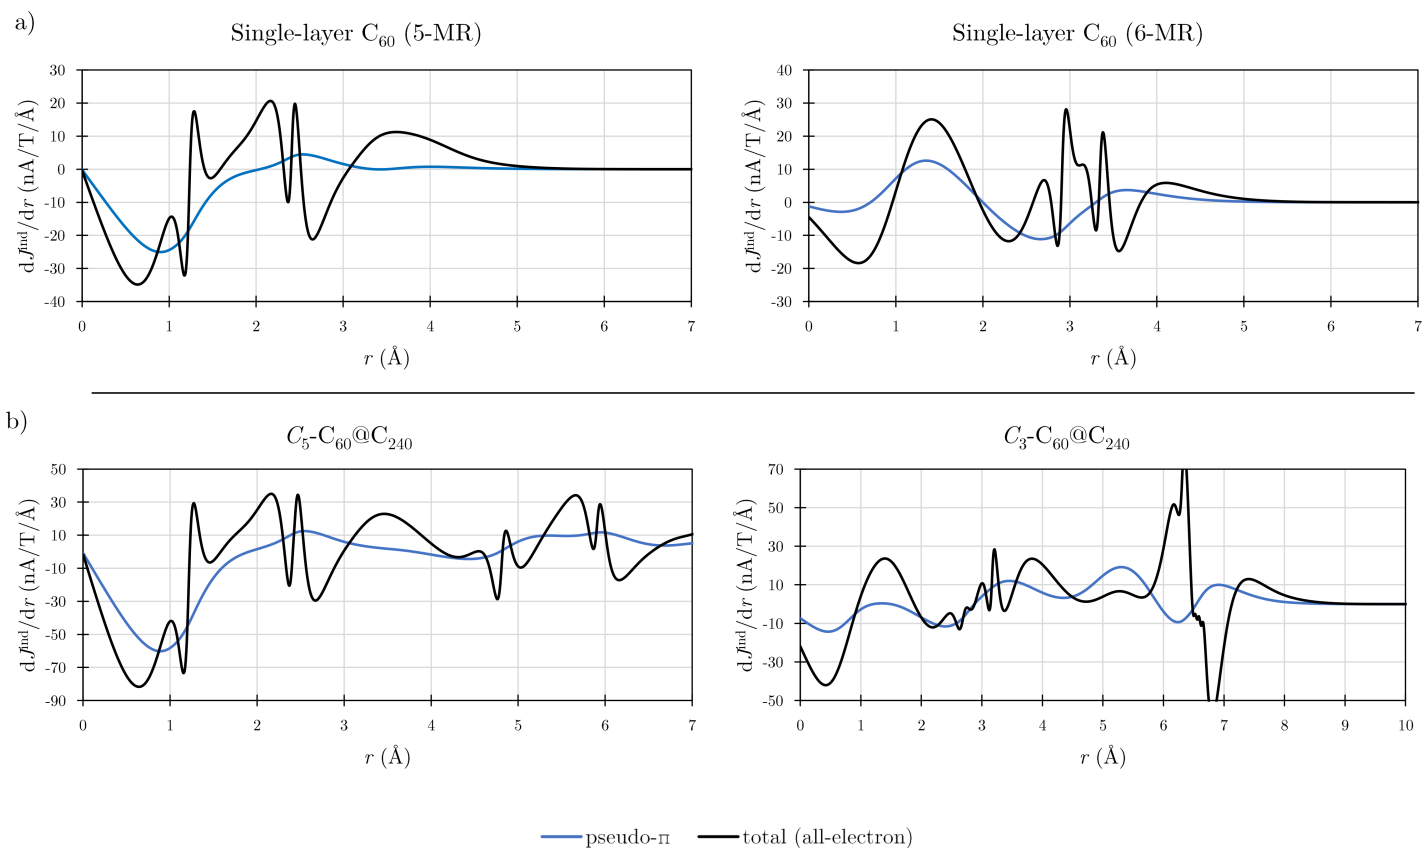

**Fig. S2** The pseudo- $\pi$  and total (all-electron) ring-current strength profiles ( $dJ^{ind}/dr$ ) for a) single-layer  $C_{60}$  and b)  $C_n$ - $C_{60}@C_{240}$  corresponding to the cases when  $\mathbf{B}^{ext}$  is perpendicular to common inter-layer 5-MRs (and 6-MRs), calculated at the CAM-B3LYP/def2-SVP level. The total and pseudo- $\pi$  ring-current strength for  $C_{60}$  is -12.0 (6.32) and -22.2 (2.37) nA/T, respectively. The total and pseudo- $\pi$  ring-current strength for  $C_n$ - $C_{60}@C_{240}$  is -17.84 (21.56) and -31.9 (13.8) nA/T, respectively.

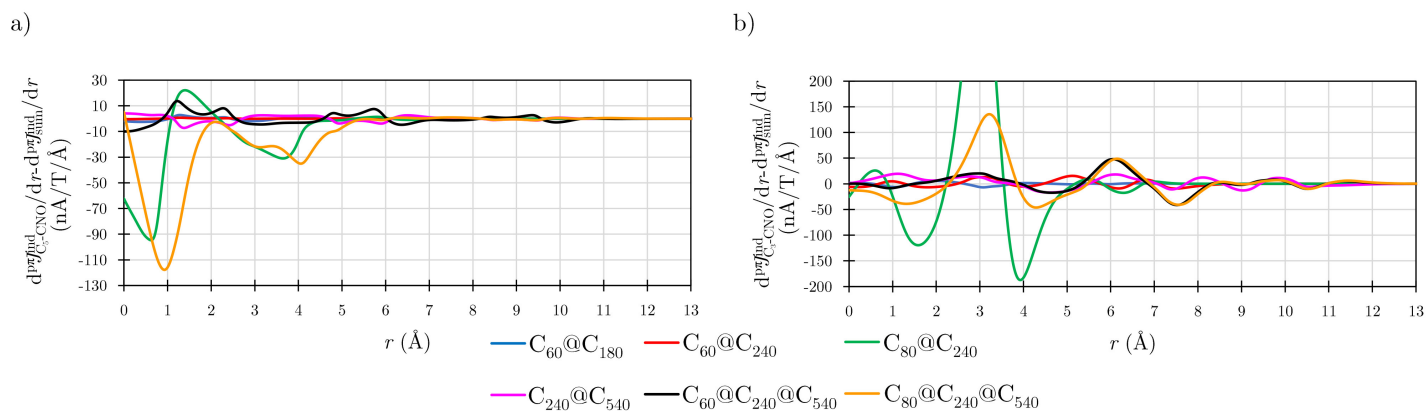

**Fig. S3** The pseudo- $\pi$  ring-current strength profiles of the differences resulting from subtracting the profile of the sum of its single-layer components ( $d^{pseudo-\pi} J_{sum}^{ind}/dr$ ) from profile of a)  $C_5$ -CNOs ( $d^{pseudo-\pi} J_{C_5-CNO}^{ind}/dr$ ) and of b)  $C_3$ -CNOs ( $d^{pseudo-\pi} J_{C_3-CNO}^{ind}/dr$ ) corresponding to the cases when  $\mathbf{B}^{ext}$  is perpendicular to common inter-layer 5-MRs and 6-MRs, respectively, calculated at the CAM-B3LYP/def2-SVP level.
